# Supplementary material for: Doenjang, A Korean Traditional Fermented Soybean Paste, Ameliorates Neuroinflammation and Neurodegeneration in Mice Fed a High-Fat Diet
Source: PubMed Central journal article supplement (PMC6723205; doi:10.3390/nu11081702), 2019-07-24
Supplement: nutrients-11-01702-s001.pdf [file nutrients-11-01702-s001.pdf]

**Supplementary Table S1.** Effects of *Doenjang* on food intake and feed efficiency ratio of mice

|                           | <b>LF</b>                 | <b>HF</b>                 | <b>SS</b>                 | <b>DJ</b>                 |
|---------------------------|---------------------------|---------------------------|---------------------------|---------------------------|
| Food intake (g/day)       | 3.93± 0.09 <sup>a</sup>   | 2.60 ± 0.08 <sup>b</sup>  | 2.69 ± 0.20 <sup>b</sup>  | 2.47 ± 0.08 <sup>b</sup>  |
| Calorie intake (kcal/day) | 15.12 ± 0.35 <sup>a</sup> | 12.35 ± 0.37 <sup>b</sup> | 12.60 ± 0.98 <sup>b</sup> | 11.21 ± 0.33 <sup>b</sup> |
| Feed efficiency ratio (%) | 3.72 ± 0.32 <sup>c</sup>  | 8.08 ± 0.53 <sup>ab</sup> | 9.77 ± 0.85 <sup>a</sup>  | 6.64 ± 0.58 <sup>b</sup>  |

LF, a low-fat diet (n = 12/group); HF, a high-fat diet (n = 12/group); SS, an HF diet containing steamed soybean (n = 12/group); DJ, an HF diet containing *Doenjang* (n = 11/group). Values are mean ± SEM. Data in the same row with different alphabetical superscript are significantly different from one another (P < 0.05).

**Supplementary Table S2.** List of primer sequences for quantitative RT-PCR (qRT-PCR)

| Gene           | Forward (5'- 3')                   | Reverse (5'- 3')         |
|----------------|------------------------------------|--------------------------|
| BACE1          | GCATGATCATTGGTGGTATC               | CCATCTTGAGATCTTGACCA     |
| BDNF           | GGCTGACACTTTTGAGCACGTC             | CTCCAAAGGCACTTGACTGCTG   |
| Caspase-1      | GAATACAACCACTCGTACAC<br>GTCTTG     | AGATCCTCCAGCAGCAACTTCA   |
| GFAP           | AACCGCATCACCATTCTT                 | CGCATCTCCACAGTCTTTACC    |
| HO-1           | CCTCACTGGCAGGAAATCATC              | CCTCGTGGAGACGCTTTACATA   |
| IDE            | CTGTGCCCTTGTTTGATGC                | GTTCCCGTAGCCTTTTCCA      |
| IL-6           | TTCCATCCAGTTGCCTTCTT               | CAGAATTGCCATTGCACAAC     |
| MCP-1          | TGATCCCAATGAGTAGGCTGG              | ATGTCTGGACCCATTCTTCTTG   |
| PS1            | TGCGGCCATCATGATCAGTGTC             | ATAAGCCAGGCGTGGATGAC     |
| TLR-4          | AGGAAGTTTCTCTGGACTAACAAG<br>TTTAGA | AAATTGTGAGCCACATTGAGTTTC |
| TNF $\alpha$   | GGCTACAGGCTTGRCACCTCGA             | CACGCTCTTCTGTCTACTGAA    |
| $\beta$ -Actin | GCTGAGAGGGAAATCGT                  | CGTCAGGCAGCTCATAG        |

BACE1,  $\beta$ -secretase 1; BDNF, brain-derived neurotrophic factor; GFAP, glial fibrillary acidic protein; HO-1, heme oxygenase 1; IDE, insulin-degrading enzyme; IL-6, interleukin 6; MCP-1, monocyte chemoattractant protein-1; PS1, presenilin 1; TLR-4, Toll-like receptor 4; TNF $\alpha$ , tumor necrosis factor  $\alpha$
